# Supplementary material for: DYRK1A suppression restrains Mcl-1 expression and sensitizes NSCLC cells to Bcl-2 inhibitors
Source: PubMed Central journal article supplement (PMC7309455; doi:10.20892/j.issn.2095-3941.2019.0380), 2020-05-15
Supplement: cbm-17-387-s001.pdf [file cbm-17-387-s001.pdf]

## Supplementary material

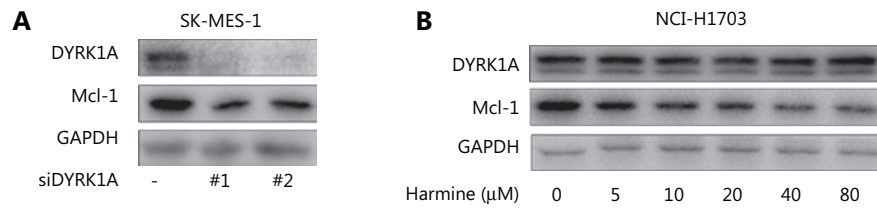

**Figure S1** DYRK1A regulates the expression of Mcl-1 in squamous cell carcinoma cells. (A) SK-MES-1 cells were transfected with control siRNA and DYRK1A siRNA for 48 h, and the expression of DYRK1A and Mcl-1 were detected by Western blot. (B) NCI-H1703 cells were treated with harmine at the indicated concentrations for 24 h, and the expression of the indicated proteins was detected by Western blot.
